# Supplementary material for: A facile and scalable strategy for fabricating bio-based photodynamic antimicrobial nonwoven eco-textiles
Source: Royal Society of Chemistry journal article supplement (doi:10.1039/d3gc03747a), 2024-01-01
Supplement: d3gc03747a1.pdf [file d3gc03747a1.pdf]

# **A facile and scalable strategy for fabricating bio-based photodynamic antimicrobial nonwoven eco-textiles**

Zihao Lv<sup>a</sup>, Qingqing Wang<sup>a,b\*</sup>, Yang Wang<sup>a</sup>, Xiaohong Yuan<sup>c</sup>, Xin Xia<sup>d</sup>, Shiqin Liao<sup>b</sup>, Qufu Wei<sup>a,b</sup>

a. Key Laboratory of Eco-textiles, Ministry of Education, Jiangnan University, Wuxi 214122, P. R. China.

\*E-mail: qqwang@jnu.edu.cn

b. Jiangxi Centre for Modern Apparel Engineering and Technology, Jiangxi Institute of Fashion Technology, Nanchang 330201, P. R. China.

c. Faculty of Clothing and Design, Minjiang University, Fuzhou 350121, Fujian, P. R. China.

d. College of Textile and Clothing, Xinjiang University, Urumqi 830046, P. R. China

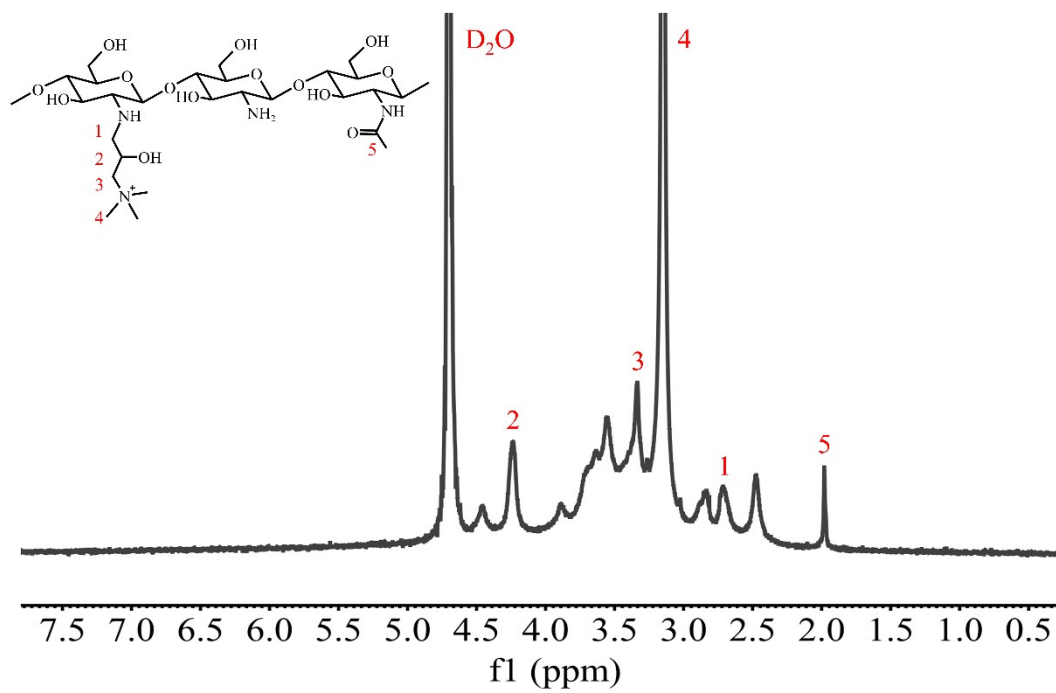

**Fig. S1.** <sup>1</sup>H NMR spectra of QCS.

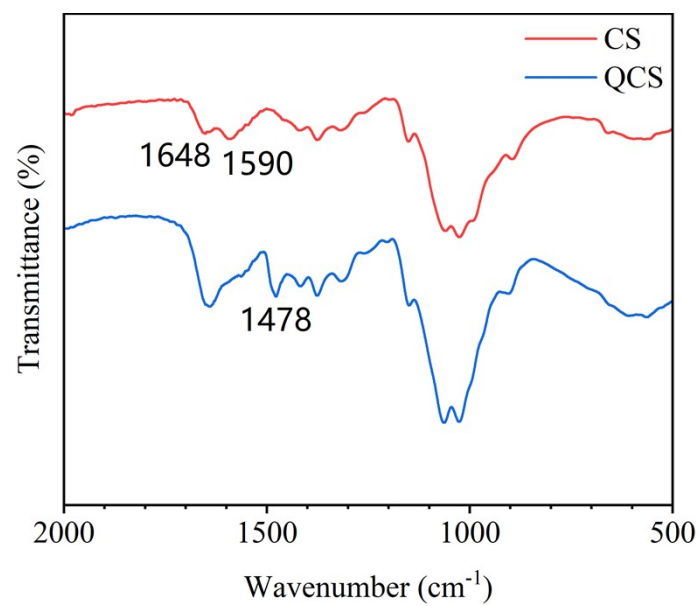

**Fig. S2.** FTIR spectra of CS and QCS.

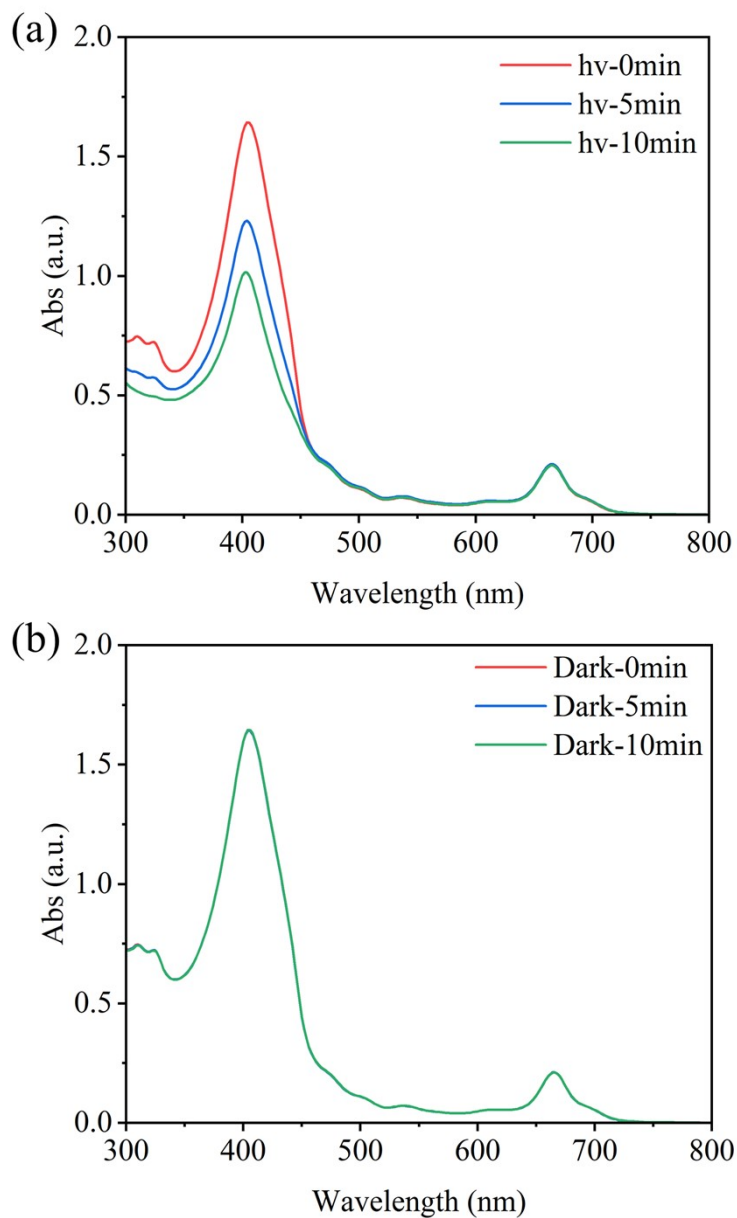

**Fig. S3.** (a) Singlet oxygen yield of SE within 10 min under Xenon light. (b) Singlet oxygen yield of SE within 10 min under dark.

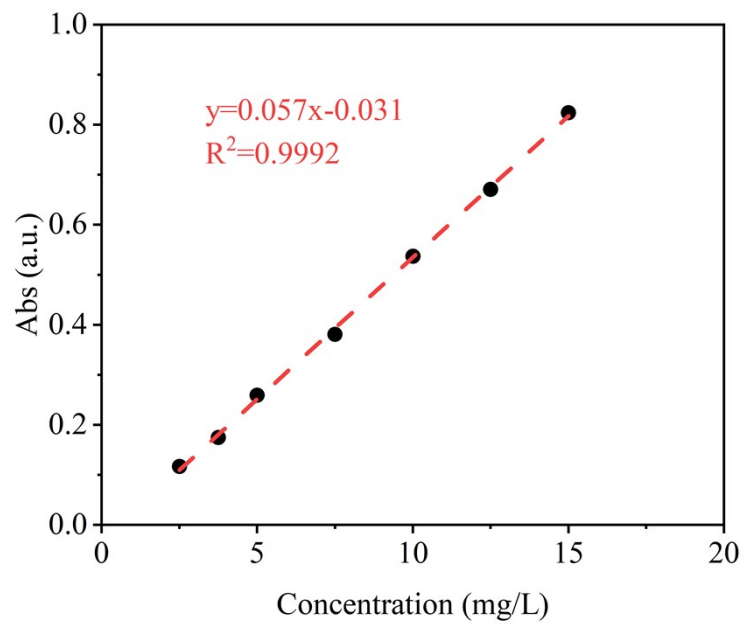

**Fig. S4.** The standard curve of SE

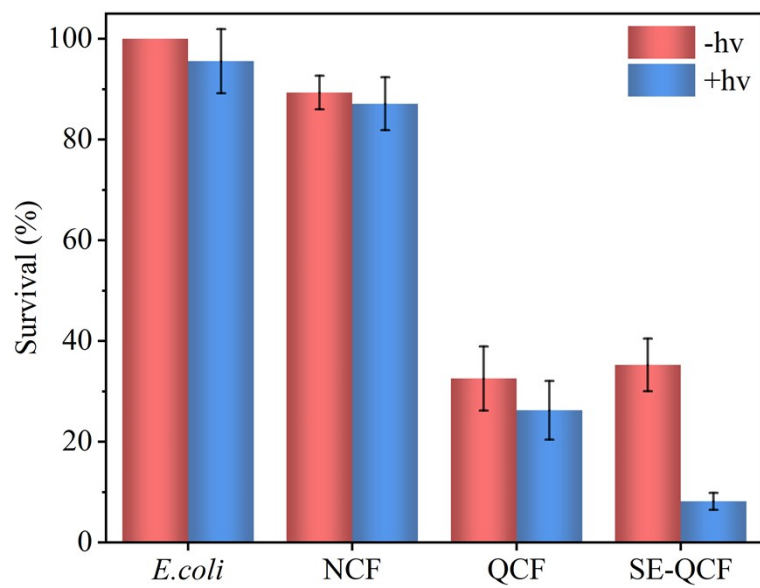

**Fig. S5.** Inhibition efficiency of NCF, QCF and SE-QCF against *E. coli* within 1h.

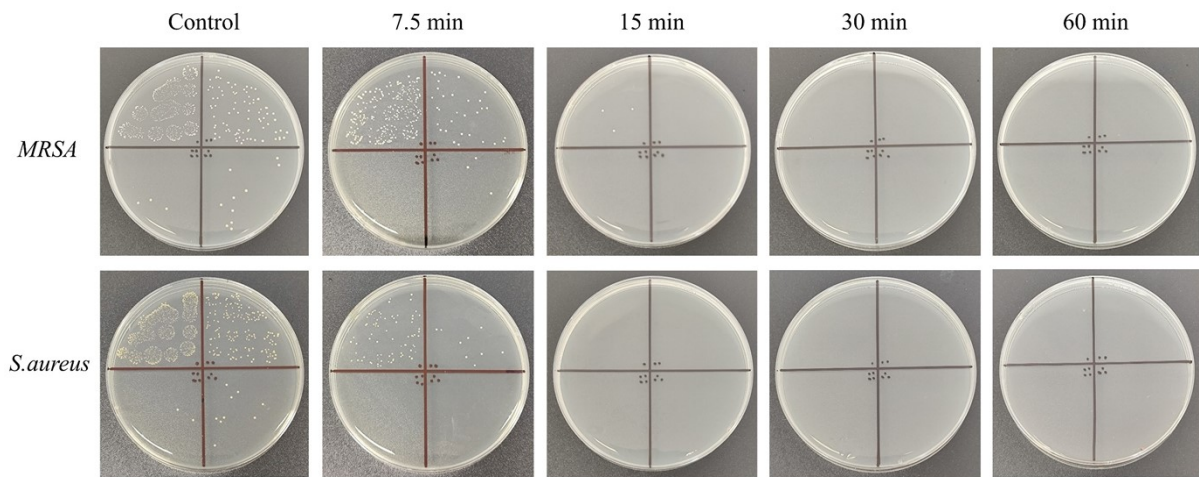

**Fig. S6.** Images of antimicrobial plates under sunlight intensity.

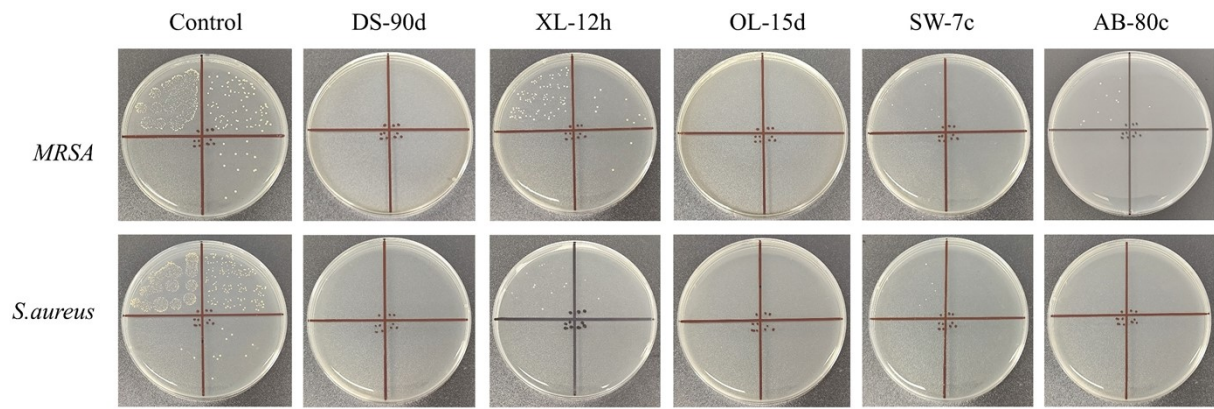

**Fig. S7.** Images of antimicrobial plates under sunlight intensity after simulating various failures.



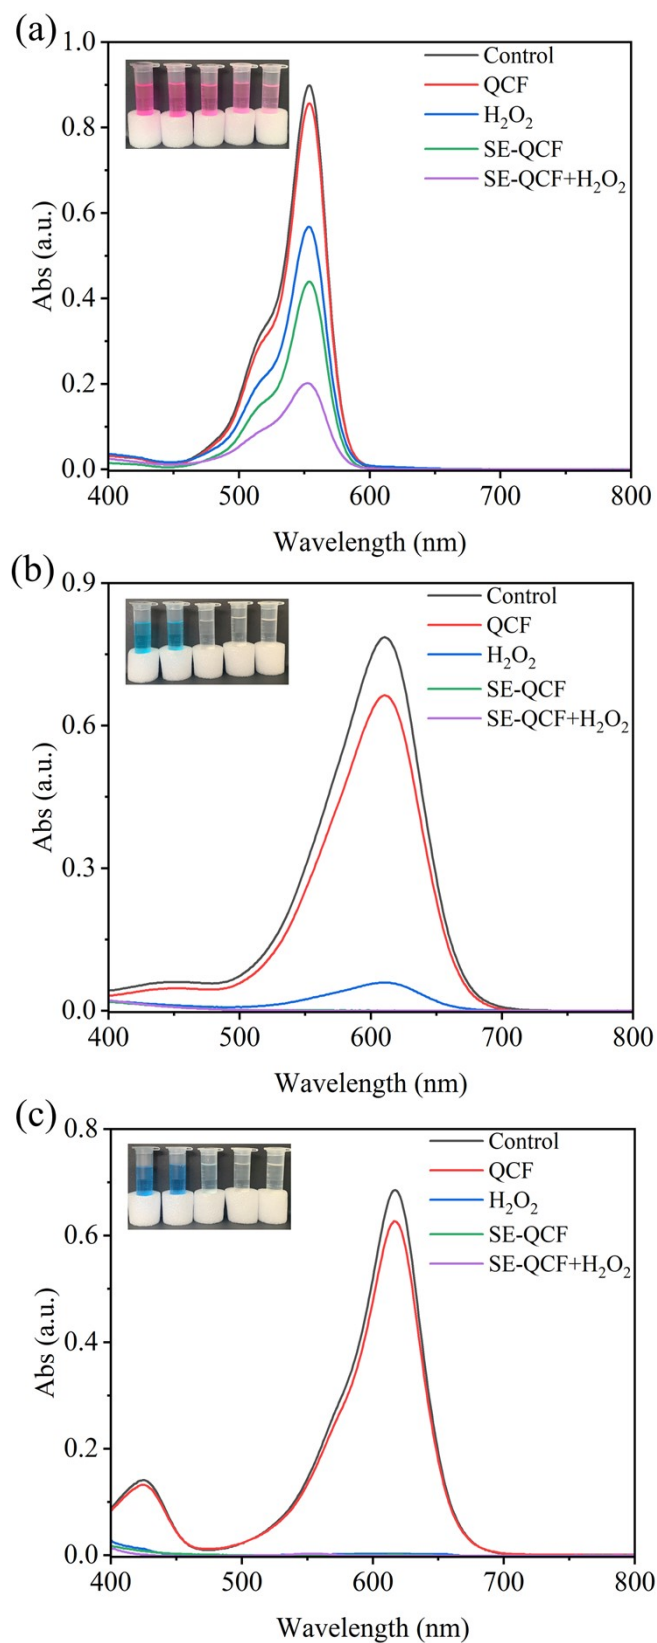

**Fig. S8.** UV-vis absorption curves and images for photodegradation of (a) rhodamine B, (b) malachite green and (c) indigo carmine.

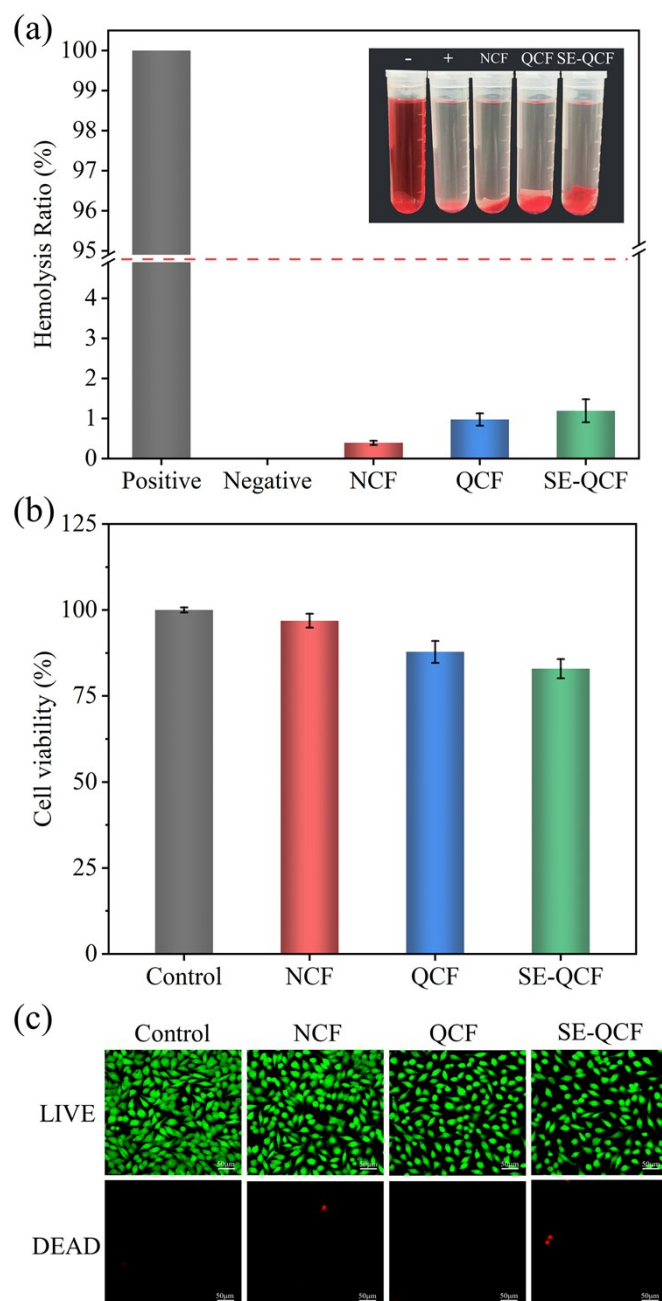

**Fig. S9.** (a) Hemolytic property, (b) Cell viability and (c) CLSM images of LIVE/DEAD cell staining of NCF, QCF and SE-QCF. Green dots and red dots represented live cells and dead cells, respectively.

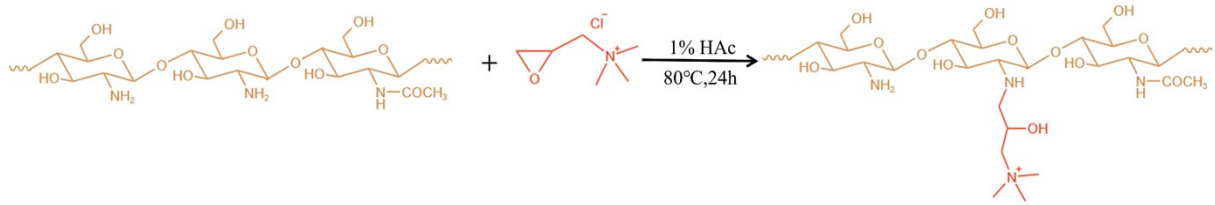

Scheme.S1 The synthesis reaction of QCS

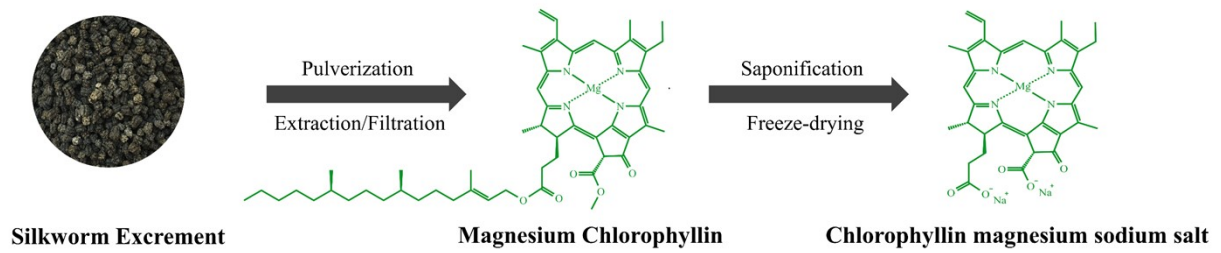

Scheme.S2 The extraction process of SE
